# Supplementary material for: Increasing water availability and facilitation weaken biodiversity–biomass relationships in shrublands
Source: PubMed Central journal article supplement (PMC6850503; doi:10.1002/ecy.2624), 2019-02-25
Supplement: ECY-100-na-s003.pdf [file ECY-100-na-s003.pdf]

**Metadata S1. Guo, Y., C. Schöb, W. Ma, A. Mohammat, H. Liu, S. Yu, Y. Jiang, B. Schmid, and Z. Tang. 2019. Increasing water availability and facilitation weaken biodiversity–biomass relationships in shrublands. *Ecology*.**

---

## **Data S1**

**Supplementary dataset and R code for statistical analysis.**

---

## **Authors**

Yanpei Guo

Institute of Ecology, College of Urban and Environmental Sciences and Key Laboratory for Earth Surface Processes, Peking University, Beijing, China  
guoyanpei@pku.edu.cn

Christian Schöb

Department of Environmental Systems Science, Swiss Federal Institute of Technology, ETH Zurich, Zurich, Switzerland  
christian.schoeb@usys.ethz.ch

Wenhong Ma

School of Life Sciences, Inner Mongolia University, Hohhot, China  
whmapku@126.com

Anwar Mohammat

Xinjiang Institute of Ecology and Geography, Chinese Academy of Sciences, Urumqi, China  
anwar@ms.xjb.ac.cn

Hongyan Liu

Institute of Ecology, College of Urban and Environmental Sciences and Key Laboratory for Earth Surface Processes, Peking University, Beijing, China  
lhy@urban.pku.edu.cn

Shunli Yu

State Key Laboratory of Vegetation and Environmental Changes, Institute of Botany, Chinese Academy of Sciences, Beijing, China  
shunliyu@ibcas.ac.cn

Youxu Jiang

Key Laboratory of Forest Ecology and Environment, State Forestry Administration, Research Institute of Forest Ecology, Environment, and Protection, Chinese Academy of Forestry, Beijing, China  
Jiangyx@caf.ac.cn

Bernhard Schmid

Department of Geography, University of Zurich, Zurich, Switzerland  
bernhard.schmid@ieu.uzh.ch

Zhiyao Tang  
Institute of Ecology, College of Urban and Environmental Sciences and Key Laboratory for Earth  
Surface Processes, Peking University, Beijing, China  
zytang@urban.pku.edu.cn

---

## File list (files found within DataS1.rar)

DataS1.csv  
code for analysis.R

## Description

DataS1.csv – List of shrubland sites with information about habitat conditions and communities.

|             |                                                                 |
|-------------|-----------------------------------------------------------------|
| site        | Code name of each shrubland site                                |
| plotarea    | Area of each plot (m <sup>2</sup> )                             |
| WL.3        | Three water availability levels according to GWI                |
| MGT         | Mean growing-season temperature (°C)                            |
| GPE         | Growing-season potential evapotranspiration (mm)                |
| GP          | Growing-season precipitation (mm)                               |
| GWI         | Growing-season wetness index                                    |
| STN         | Soil total nitrogen concentration (mg g <sup>-1</sup> )         |
| STP         | Soil total phosphorus concentration (mg g <sup>-1</sup> )       |
| richness.h  | Species richness of herbaceous plants                           |
| richness.so | Original species richness of shrubs                             |
| richness.s  | Species richness of shrubs after correction for plot sizes      |
| herbL       | Aboveground biomass of herbaceous plants (Mg hm <sup>-2</sup> ) |
| herbR       | Belowground biomass of herbaceous plants (Mg hm <sup>-2</sup> ) |
| hbiomass    | Total biomass of herbaceous plants (Mg hm <sup>-2</sup> )       |
| shrubR      | Belowground biomass of shrubs (Mg hm <sup>-2</sup> )            |
| sabove      | Aboveground biomass of shrubs (Mg hm <sup>-2</sup> )            |
| sbiomass    | Total biomass of shrubs (Mg hm <sup>-2</sup> )                  |
| sID         | Individual density of shrubs (m <sup>-2</sup> )                 |

code for analysis.R - R script for structural equation modelling and residual regression.  
Annotations of code are included throughout the script.

---
